# Supplementary material
Source: PubMed Central journal article supplement (PMC4678343)
Supplement: aasm.39.1.87s1.pdf [file aasm.39.1.87s1.pdf]

## Supplemental material:

All non-significant intra-network results with habitual cTST as the dependent variable:

Table S1(a)

ACC (seed)

| Model      | B       | Std. Error | $\beta$ | t      | P      | Zero-order R |       |
|------------|---------|------------|---------|--------|--------|--------------|-------|
| (Constant) | 113.696 | 10.897     |         | 10.433 | .000   |              |       |
| Age        | .097    | .240       |         | .075   | .405   | -.010        |       |
| LIN        | -66.975 | 49.930     |         | -.262  | -.1341 | .191         | -.324 |
| RIN        | -87.137 | 60.512     |         | -.270  | -1.440 | .162         | -.349 |

$R^2=0.178$   $F=1.883$   $P=0.157$

Table S1(b)

LAI (seed)

| Model      | B        | Std. Error | $\beta$ | t     | P      | Zero-order R |       |
|------------|----------|------------|---------|-------|--------|--------------|-------|
| (Constant) | 96.565   | 11.611     |         | 8.316 | .000   |              |       |
| Age        | .017     | .230       |         | .013  | .075   | .941         | -.015 |
| RIN        | 84.862   | 47.944     |         | .339  | 1.770  | .088         | .182  |
| ACC        | -125.339 | 56.354     |         | -.423 | -2.224 | .035         | -.299 |

$R^2=0.188$   $F=2.003$   $P=0.138$

Non-significant results of the regression analysis between habitual cTST (dependent variable) and SN(seeded) intra-network connectivity (table S1 (a) and (b) above).

Table S2(a)  
PCC (seed)

| Model      | B       | Std. Error | $\beta$ | t     | P     | Zero-order R |
|------------|---------|------------|---------|-------|-------|--------------|
| (Constant) | 86.370  | 9.916      |         | 8.710 | .000  |              |
| Age        | -.133   | .345       |         | -.117 | .387  | -.003        |
| LIPC       | 17.922  | 34.014     |         | .215  | .527  | .603         |
| LMTL       | 23.767  | 34.851     |         | .253  | .682  | .502         |
| LHC        | -10.152 | 53.729     |         | -.067 | .189  | .852         |
| MPFC       | 62.765  | 31.497     |         | .510  | 1.993 | .058         |
| RIPC       | -22.033 | 33.380     |         | -.226 | .660  | .516         |
| RMTL       | 21.371  | 37.708     |         | .181  | .567  | .576         |
| RHC        | -77.804 | 54.713     |         | -.470 | 1.422 | .168         |

$R^2=0.411$   $F= 2.010$   $P=0.91$

Table S2(b)  
LIPC (seed)

| Model      | B       | Std. Error | $\beta$ | t     | P     | Zero-order R |
|------------|---------|------------|---------|-------|-------|--------------|
| (Constant) | 82.668  | 14.367     |         | 5.754 | .000  |              |
| Age        | -.021   | .316       |         | -.016 | .949  | .026         |
| RIPC       | 38.251  | 64.987     |         | .139  | .589  | .562         |
| MPFC       | 58.918  | 38.995     |         | .323  | 1.511 | .145         |
| PCC        | 27.217  | 39.738     |         | .154  | .685  | .501         |
| RMTL       | 7.203   | 101.157    |         | .023  | .944  | .204         |
| LMTL       | 74.377  | 77.123     |         | .294  | .964  | .345         |
| RHC        | 59.180  | 68.429     |         | .179  | .865  | .396         |
| LHC        | -10.152 | 53.729     |         | -.067 | .189  | .852         |

$R^2=0.198$   $F=0.777$   $P=0.613$

Table S2(c)  
LMTL (seed)

| Model      | B        | Std. Error | $\beta$ | t      | P     | Zero-order R |
|------------|----------|------------|---------|--------|-------|--------------|
| (Constant) | 102.259  | 16.017     |         | 6.384  | .000  |              |
| Age        | -.126    | .299       | -.098   | -.421  | .678  | -.015        |
| RIPC       | 37.465   | 56.433     | .155    | .664   | .514  | .320         |
| LIPC       | -8.738   | 44.766     | -.047   | -.195  | .847  | .255         |
| LHC        | 141.411  | 79.174     | .535    | 1.786  | .089  | .296         |
| MPFC       | -.017    | 30.849     | .000    | -.001  | 1.000 | .213         |
| PCC        | 59.971   | 33.379     | .417    | 1.797  | .087  | .541         |
| RMTL       | -1.806   | 52.057     | -.008   | -.035  | .973  | -.178        |
| RHC        | -138.338 | 96.984     | -.442   | -1.426 | .168  | .018         |

$R^2=0.416$  |  $F=1.871$  |  $P=0.119$

Table S2(d)  
LHC (seed)

| Model      | B        | Std. Error | $\beta$ | t      | P    | Zero-order R |
|------------|----------|------------|---------|--------|------|--------------|
| (Constant) | 71.379   | 17.604     |         | 4.055  | .001 |              |
| Age        | .056     | .283       | .043    | .197   | .846 | -.015        |
| LIPC       | 157.730  | 72.970     | .589    | 2.162  | .042 | .165         |
| LMTL       | 24.873   | 103.214    | .077    | .241   | .812 | .215         |
| MPFC       | 23.597   | 38.249     | .126    | .617   | .544 | .014         |
| PCC        | 75.540   | 50.246     | .336    | 1.503  | .148 | .106         |
| RIPC       | -192.782 | 87.206     | -.596   | -2.211 | .038 | -.173        |
| RMTL       | 21.180   | 100.810    | .062    | .210   | .836 | .174         |
| RHC        | 141.979  | 91.508     | .325    | 1.552  | .136 | .185         |

$R^2=0.324$  |  $F=1.260$  |  $P=0.315$

Table S2(e)  
RIPC (seed)

| Model      | B       | Std. Error | $\beta$ | t     | P     | Zero-order R |
|------------|---------|------------|---------|-------|-------|--------------|
| (Constant) | 86.959  | 21.301     |         | 4.082 | .001  |              |
| Age        | .222    | .391       |         | .168  | .568  | .260         |
| LIPC       | .752    | 31.797     |         | .005  | .024  | .981         |
| LMTL       | 29.545  | 44.411     |         | .230  | .665  | .513         |
| LHC        | -24.677 | 62.015     |         | -.149 | -.398 | .695         |
| MPFC       | 25.025  | 27.497     |         | .205  | .910  | .373         |
| PCC        | -10.176 | 25.066     |         | -.144 | -.406 | .689         |
| RMTL       | 17.111  | 45.189     |         | .129  | .379  | .709         |
| RHC        | 25.420  | 79.103     |         | .123  | .321  | .751         |

$R^2=0.195$   $F=0.637$   $P=0.739$

Table S2(f)  
RMTL (seed)

| Model      | B       | Std. Error | $\beta$ | t     | P     | Zero-order R |
|------------|---------|------------|---------|-------|-------|--------------|
| (Constant) | 87.072  | 20.880     |         | 4.170 | .000  |              |
| Age        | .215    | .383       |         | .162  | .560  | .260         |
| LIPC       | .040    | 31.117     |         | .000  | .001  | .999         |
| LMTL       | 39.622  | 34.855     |         | .308  | 1.137 | .268         |
| LHC        | -21.727 | 60.314     |         | -.131 | -.360 | .722         |
| MPFC       | 27.286  | 26.313     |         | .224  | 1.037 | .311         |
| PCC        | -7.092  | 23.240     |         | -.101 | -.305 | .763         |
| RHC        | 19.162  | 75.836     |         | .093  | .253  | .803         |
| RIPC       | 17.111  | 45.189     |         | .129  | .379  | .709         |

$R^2=0.190$   $F=0.736$   $P=0.644$

Table S2(g)  
RHC (seed)

| Model      | B       | Std. Error | $\beta$ | t     | P     | Zero-order R |
|------------|---------|------------|---------|-------|-------|--------------|
| (Constant) | 66.978  | 15.375     |         | 4.356 | .000  |              |
| Age        | .172    | .297       |         | .134  | .578  | -.041        |
| RIPC       | -7.508  | 90.474     |         | -.021 | .935  | -.027        |
| LIPC       | 35.664  | 34.620     |         | .208  | 1.030 | .272         |
| LHC        | 162.193 | 76.155     |         | .427  | 2.130 | .395         |
| LMTL       | 36.701  | 149.226    |         | .102  | .246  | -.135        |
| MPFC       | 20.671  | 37.801     |         | .121  | .547  | .007         |
| PCC        | 39.954  | 70.025     |         | .190  | .571  | .181         |
| RMTL       | -81.145 | 94.149     |         | -.203 | .862  | -.187        |

$R^2=0.280$   $F=1.019$   $P=0.452$

Non-significant results of the regression analysis between habitual cTST (dependent variable) and DMN(seeded) intra-network connectivity (table S2(a) - (g) above).

Table S3(a)  
LDLPFC (seed)

| Model      | B       | Std. Error | $\beta$ | t     | P    | Zero-order R |
|------------|---------|------------|---------|-------|------|--------------|
| (Constant) | 104.012 | 13.036     |         | 7.979 | .000 |              |
| Age        | .017    | .274       |         | .013  | .952 | -.007        |
| RDLPFC     | -33.459 | 64.508     | -.120   | -.519 | .609 | -.078        |
| LIPL       | -6.937  | 81.800     | -.026   | -.085 | .933 | .107         |
| RIPL       | 52.738  | 99.228     | .165    | .531  | .600 | .125         |

$R^2=0.027$   $F=0.173$   $P=0.950$

Table S3(b)  
LIPL (seed)

| Model      | B       | Std. Error | $\beta$ | t     | P    | Zero-order R |
|------------|---------|------------|---------|-------|------|--------------|
| (Constant) | 99.523  | 13.424     |         | 7.414 | .000 |              |
| Age        | -.074   | .291       |         | -.058 | .801 | .026         |
| LDLPFC     | -32.926 | 74.047     | -.130   | -.445 | .660 | -.160        |
| RDLPFC     | -27.480 | 90.856     | -.085   | -.302 | .765 | -.129        |
| RIPL       | 5.212   | 72.781     | .019    | .072  | .943 | .044         |

$R^2=0.031$   $F=0.200$   $P=0.936$

Table S3(c)  
RDLPFC(seed)

| Model      | B       | Std. Error | $\beta$ | t      | P    | Zero-order R |
|------------|---------|------------|---------|--------|------|--------------|
| (Constant) | 101.954 | 10.092     |         | 10.102 | .000 |              |
| Age        | -.487   | .393       |         | -1.239 | .227 | -.023        |
| LDLPFC     | 42.001  | 26.225     | .410    | 1.602  | .122 | .213         |
| LIPL       | -9.454  | 23.854     | -.086   | -.396  | .695 | -.060        |
| RIPL       | -9.567  | 39.929     | -.065   | -.240  | .813 | -.058        |

$R^2=0.105$   $F=0.734$   $P=0.578$

Table S3(d)  
RIPL (seed)

| Model      | B      | Std. Error | $\beta$ | t     | P    | Zero-order R |
|------------|--------|------------|---------|-------|------|--------------|
| (Constant) | 75.280 | 15.395     |         | 4.890 | .000 |              |
| Age        | .489   | .274       |         | 1.787 | .086 | .260         |
| LDLPFC     | -6.880 | 27.998     | -.052   | -.246 | .808 | -.075        |
| LIPL       | 11.242 | 24.886     | .082    | .452  | .655 | .047         |
| RDLPFC     | 40.078 | 21.046     | .378    | 1.904 | .068 | .232         |

$R^2=0.191$   $F=1.480$   $P=0.238$

Non-significant results of the regression analysis between habitual cTST (dependent variable) and CEN(seeded) intra-network connectivity (table S3 (a) - (d) above).

All non-significant inter-network results with cTST as the dependent variable:

Table S4(a)  
ACC (seed)

| Model      | B       | Std. Error | $\beta$ | t     | P    | Zero-order R |
|------------|---------|------------|---------|-------|------|--------------|
| (Constant) | 92.385  | 16.209     |         | 5.700 | .000 |              |
| Age        | -.048   | .370       | -.038   | -.131 | .897 | -.010        |
| LIPC       | 35.090  | 66.122     | .147    | .531  | .601 | .181         |
| RIPC       | -45.863 | 94.977     | -.129   | -.483 | .634 | .092         |
| LMTL       | -97.148 | 134.810    | -.305   | -.721 | .479 | -.111        |
| LHC        | -28.593 | 84.586     | -.106   | -.338 | .739 | -.196        |
| MPFC       | 58.431  | 55.810     | .296    | 1.047 | .308 | .237         |
| PCC        | -26.471 | 47.067     | -.151   | -.562 | .580 | .052         |
| RMTL       | -14.346 | 119.899    | -.048   | -.120 | .906 | -.130        |
| RHC        | -71.106 | 92.847     | -.237   | -.766 | .453 | -.143        |

$R^2=0.178$   $F= 1.883$   $P=0.157$

Table S4(b)  
LAI (seed)

| Model      | B       | Std. Error | $\beta$ | t     | P    | Zero-order R |
|------------|---------|------------|---------|-------|------|--------------|
| (Constant) | 93.788  | 13.091     |         | 7.165 | .000 |              |
| LIPC       | -45.551 | 79.802     | -.225   | -.571 | .574 | -.070        |
| LMTL       | -24.651 | 85.666     | -.090   | -.288 | .776 | -.102        |
| LHC        | -53.480 | 120.582    | -.179   | -.444 | .662 | -.236        |
| MPFC       | 2.082   | 39.332     | .012    | .053  | .958 | .075         |
| PCC        | 12.165  | 49.222     | .062    | .247  | .807 | .009         |
| RIPC       | -19.356 | 78.564     | -.076   | -.246 | .808 | -.169        |
| RMTL       | .368    | 91.175     | .001    | .004  | .997 | -.060        |
| RHC        | -74.645 | 177.770    | -.208   | -.420 | .679 | -.201        |
| Age        | -.058   | .379       | -.045   | -.154 | .879 | -.015        |

$R^2=0.124$   $F= 0.314$   $P=0.961$

Non-significant results of the regression analysis between habitual cTST (dependent variable) and SN(seeded) inter-network connectivity with the DMN (table S4 (a) and (b) above).



Table S5(a)  
PCC (seed)

| Model      | B       | Std. Error | $\beta$ | t      | P      | Zero-order R |
|------------|---------|------------|---------|--------|--------|--------------|
| (Constant) | 98.721  | 8.157      |         | 12.102 | .000   |              |
| Age        | .027    | .260       |         | .024   | .103   | -.003        |
| LAI        | 55.988  | 58.169     |         | .390   | .963   | .092         |
| ACC        | 24.777  | 32.174     |         | .248   | .770   | .106         |
| RAI        | -67.824 | 48.291     |         | -.556  | -1.404 | -.035        |

$R^2=0.082$   $F= 0.601$   $P=0.665$

Table S5(b)  
LIPC (seed)

| Model      | B        | Std. Error | $\beta$ | t     | P      | Zero-order R |
|------------|----------|------------|---------|-------|--------|--------------|
| (Constant) | 90.091   | 11.371     |         | 7.923 | .000   |              |
| Age        | .024     | .247       |         | .019  | .096   | .026         |
| ACC        | 78.311   | 63.553     |         | .237  | 1.232  | .203         |
| LAI        | 28.080   | 48.396     |         | .119  | .580   | -.056        |
| RAI        | -103.801 | 58.731     |         | -.363 | -1.767 | -.296        |

$R^2=0.149$   $F= 1.098$   $P=0.397$

Table S5(c)  
LMTL (seed)

| Model      | B       | Std. Error | $\beta$ | t      | P      | Zero-order R |
|------------|---------|------------|---------|--------|--------|--------------|
| (Constant) | 96.565  | 9.214      |         | 10.480 | .000   |              |
| Age        | -.021   | .251       |         | -.016  | -.083  | -.015        |
| ACC        | 50.189  | 55.002     |         | .192   | .912   | .043         |
| LAI        | -9.148  | 41.220     |         | -.047  | -.222  | -.153        |
| RAI        | -67.416 | 45.766     |         | -.335  | -1.473 | -.272        |

$R^2=0.107$   $F=0.749$   $P=0.568$

Table 5(d)  
LPH (seed)

| Model      | B       | Std. Error | $\beta$ | t      | P      | Zero-order R |
|------------|---------|------------|---------|--------|--------|--------------|
| (Constant) | 97.772  | 9.103      |         | 10.740 | .000   |              |
| Age        | -.113   | .290       |         | -.087  | -.388  | -.015        |
| ACC        | -18.954 | 82.387     |         | -.055  | -.230  | -.108        |
| LAI        | 37.874  | 59.385     |         | .163   | .638   | -.055        |
| RAI        | -97.572 | 79.903     |         | -.327  | -1.221 | -.234        |

$R^2=0.075$   $F=0.505$   $P=0.732$

Table S5(e)  
RIPC (seed)

| Model      | B       | Std. Error | $\beta$ | t     | P    | Zero-order |
|------------|---------|------------|---------|-------|------|------------|
| (Constant) | 77.663  | 12.116     |         | 6.410 | .000 |            |
| Age        | .608    | .336       | .460    | 1.812 | .082 | .260       |
| ACC        | 11.793  | 34.006     | .112    | .347  | .732 | -.006      |
| LAI        | -12.337 | 44.440     | -.074   | -.278 | .784 | -.029      |
| RAI        | -18.499 | 21.700     | -.250   | -.852 | .402 | .013       |

$R^2=0.117$   $F=0.832$   $P=0.518$

Table S5(f)  
RMTL (seed)

| Model      | B       | Std. Error | $\beta$ | t     | P    | Zero-order R |
|------------|---------|------------|---------|-------|------|--------------|
| (Constant) | 77.663  | 12.116     |         | 6.410 | .000 |              |
| Age        | .608    | .336       | .460    | 1.812 | .082 | .260         |
| ACC        | 11.793  | 34.006     | .112    | .347  | .732 | -.006        |
| LAI        | -12.337 | 44.440     | -.074   | -.278 | .784 | -.029        |
| RAI        | -18.499 | 21.700     | -.250   | -.852 | .402 | .013         |

$R^2=0.118$   $F=0.830$   $P=0.517$

Table S5(g)  
RPH (seed)

| Model      | B        | Std. Error | $\beta$ | t      | P    | Zero-order R |
|------------|----------|------------|---------|--------|------|--------------|
| (Constant) | 101.545  | 9.337      |         | 10.876 | .000 |              |
| Age        | -.153    | .254       | -.119   | -.603  | .552 | -.041        |
| ACC        | -7.289   | 56.978     | -.025   | -.128  | .899 | -.090        |
| LAI        | 17.018   | 54.544     | .069    | .312   | .758 | -.131        |
| RAI        | -102.296 | 60.819     | -.378   | -1.682 | .105 | -.330        |

$R^2=0.123$   $F=0.877$   $P=0.492$

Non-significant results of the regression analysis between habitual cTST (dependent variable) and DMN(seeded) inter-network connectivity with the SN (Table S5(a) - (g) above).

Table S6(a)  
ACC (seed)

| Model      | B        | Std. Error | $\beta$ | t      | P    | Zero-order R |
|------------|----------|------------|---------|--------|------|--------------|
| (Constant) | 111.877  | 13.021     |         | 8.592  | .000 |              |
| Age        | -.118    | .255       | -.091   | -.463  | .648 | -.010        |
| LIPL       | 3.047    | 68.542     | .013    | .044   | .965 | .181         |
| RIPL       | 67.509   | 93.875     | .190    | .719   | .479 | .092         |
| LDLPFC     | 69.041   | 108.353    | .202    | .637   | .530 | -.067        |
| RDLPFC     | -143.702 | 94.607     | -.474   | -1.519 | .142 | -.275        |

$R^2=0.137$   $F=0.765$   $P=0.584$

Table S6(b)  
RAI (seed)

| Model      | B       | Std. Error | $\beta$ | t      | P    | Zero-order R |
|------------|---------|------------|---------|--------|------|--------------|
| (Constant) | 115.389 | 14.223     |         | 8.113  | .000 |              |
| Age        | -.522   | .355       | -.404   | -1.472 | .154 | -.023        |
| LIPL       | 7.523   | 36.249     | .042    | .208   | .837 | -.093        |
| RIPL       | 47.219  | 29.177     | .611    | 1.618  | .119 | .300         |
| LDLPFC     | -25.226 | 34.186     | -.298   | -.738  | .468 | .151         |
| RDLPFC     | 23.241  | 22.552     | .301    | 1.031  | .313 | .228         |

$R^2=0.213$   $F=1.298$   $P=0.298$

Table S6(c)  
LAI (seed)

| Model      | B       | Std. Error | $\beta$ | t     | P    | Zero-order R |
|------------|---------|------------|---------|-------|------|--------------|
| (Constant) | 96.827  | 12.302     |         | 7.871 | .000 |              |
| LDLPFC     | -15.800 | 81.325     | -.057   | -.194 | .848 | -.073        |
| LIPL       | 16.289  | 68.374     | .080    | .238  | .814 | -.070        |
| RDLPFC     | -18.685 | 87.138     | -.058   | -.214 | .832 | -.146        |
| RIPL       | -46.684 | 79.591     | -.184   | -.587 | .563 | -.169        |
| Age        | -.029   | .271       | -.023   | -.108 | .915 | -.015        |

$R^2=0.038$   $F=0.192$   $P=0.963$

Non-significant results of the regression analysis between habitual cTST (dependent variable) and SN(seeded) inter-network connectivity with the CEN (table 6(a),(b),(c) above).

Table S7(a)  
LDLPFC (seed)

| Model      | B       | Std. Error | $\beta$ | t      | P    | Zero-order R |
|------------|---------|------------|---------|--------|------|--------------|
| (Constant) | 113.926 | 9.646      |         | 11.810 | .000 |              |
| Age        | -.098   | .230       | -.076   | -.428  | .672 | -.023        |
| ACC        | -70.465 | 33.889     | -.371   | -2.079 | .048 | -.403        |
| LAI        | 18.770  | 31.681     | .119    | .592   | .559 | -.064        |
| RAI        | -51.767 | 33.988     | -.307   | -1.523 | .140 | -.312        |

$R^2=0.239$   $F=1.968$   $P=0.130$

Table S7(b)  
LIPL (seed)

| Model      | B       | Std. Error | $\beta$ | t     | P    | Zero-order R |
|------------|---------|------------|---------|-------|------|--------------|
| (Constant) | 77.663  | 12.116     |         | 6.410 | .000 |              |
| Age        | .608    | .336       | .460    | 1.812 | .082 | .260         |
| ACC        | 11.793  | 34.006     | .112    | .347  | .732 | -.006        |
| LAI        | -12.337 | 44.440     | -.074   | -.278 | .784 | -.029        |
| RAI        | -18.499 | 21.700     | -.250   | -.852 | .402 | .013         |

$R^2=0.117$   $F=0.832$   $P=0.518$

Table S7(c)  
RDLPFC (seed)

| Model      | B       | Std. Error | $\beta$ | t      | P    | Zero-order R |
|------------|---------|------------|---------|--------|------|--------------|
| (Constant) | 113.926 | 9.646      |         | 11.810 | .000 |              |
| Age        | -.098   | .230       | -.076   | -.428  | .672 | -.023        |
| ACC        | -70.465 | 33.889     | -.371   | -2.079 | .048 | -.403        |
| LAI        | 18.770  | 31.681     | .119    | .592   | .559 | -.064        |
| RAI        | -51.767 | 33.988     | -.307   | -1.523 | .140 | -.312        |

$R^2=0.239$   $F=1.968$   $P=0.130$

Table S7(d)  
RIPL (seed)

| Model      | B       | Std. Error | $\beta$ | t     | P    | Zero-order R |
|------------|---------|------------|---------|-------|------|--------------|
| (Constant) | 77.663  | 12.116     |         | 6.410 | .000 |              |
| Age        | .608    | .336       | .460    | 1.812 | .082 | .260         |
| ACC        | 11.793  | 34.006     | .112    | .347  | .732 | -.006        |
| LAI        | -12.337 | 44.440     | -.074   | -.278 | .784 | -.029        |
| RAI        | -18.499 | 21.700     | -.250   | -.852 | .402 | .013         |

$R^2=0.117$   $F=0.832$   $P=0.518$

Non-significant results of the regression analysis between habitual cTST (dependent variable) and CEN(seeded) inter-network connectivity with the SN (table S7(a) - (d) above).

Table S8(a)  
MPFC (seed)

| Model      | B       | Std. Error | $\beta$ | t      | P    | Zero-order R |
|------------|---------|------------|---------|--------|------|--------------|
| (Constant) | 105.398 | 6.566      |         | 16.051 | .000 |              |
| Age        | -.351   | .190       | -.313   | -1.845 | .076 | -.048        |
| RDLPFC     | -43.627 | 25.700     | -.319   | -1.698 | .101 | -.297        |
| LDLPFC     | 48.276  | 30.745     | .334    | 1.570  | .128 | -.131        |
| RIPL       | 43.848  | 31.135     | .441    | 1.408  | .170 | .479         |
| LIPL       | 22.468  | 26.099     | .267    | .861   | .397 | .469         |

$R^2=0.402$   $F=3.765$   $P=0.01$

Table S8(b)  
PCC (seed)

| Model      | B      | Std. Error | $\beta$ | t      | P    | Zero-order R |
|------------|--------|------------|---------|--------|------|--------------|
| (Constant) | 98.869 | 8.742      |         | 11.309 | .000 |              |
| Age        | -.349  | .372       | -.304   | -.939  | .357 | -.003        |
| RIPL       | 4.002  | 34.823     | .041    | .115   | .909 | .102         |
| LIPL       | 53.689 | 33.892     | .661    | 1.584  | .125 | .131         |
| RDLPFC     | 34.233 | 32.382     | .350    | 1.057  | .300 | .096         |
| LDLPFC     | 15.097 | 30.659     | .128    | .492   | .627 | .128         |

$R^2=0.142$   $F=0.858$   $P=0.522$

Table S8(c)  
RIPC (seed)

| Model      | B      | Std. Error | $\beta$ | t     | P    | Zero-order R |
|------------|--------|------------|---------|-------|------|--------------|
| (Constant) | 75.280 | 15.395     |         | 4.890 | .000 |              |
| Age        | .489   | .274       | .370    | 1.787 | .086 | .260         |
| LDLPFC     | -6.880 | 27.998     | -.052   | -.246 | .808 | -.075        |
| LIPL       | 11.242 | 24.886     | .082    | .452  | .655 | .047         |
| RDLPFC     | 40.078 | 21.046     | .378    | 1.904 | .068 | .232         |
| RIPL       | 4.002  | 34.823     | .041    | .115  | .909 | .102         |

$R^2=0.191$   $F=1.480$   $P=0.238$

Table S8(d)  
RMTL (seed)

| Model      | B      | Std. Error | $\beta$ | t     | P    | Zero-order R |
|------------|--------|------------|---------|-------|------|--------------|
| (Constant) | 75.280 | 15.395     |         | 4.890 | .000 |              |
| Age        | .489   | .274       | .370    | 1.787 | .086 | .260         |
| LDLPFC     | -6.880 | 27.998     | -.052   | -.246 | .808 | -.075        |
| LIPL       | 11.242 | 24.886     | .082    | .452  | .655 | .047         |
| RDLPFC     | 40.078 | 21.046     | .378    | 1.904 | .068 | .232         |
| RIPL       | 5.212  | 72.781     | .019    | .072  | .943 | .044         |

$R^2=0.191$   $F=1.480$   $P=0.283$

Table S8(e)  
RHC (seed)

| Model      | B       | Std. Error | $\beta$ | t      | P    | Zero-order R |
|------------|---------|------------|---------|--------|------|--------------|
| (Constant) | 97.577  | 9.776      |         | 9.982  | .000 |              |
| Age        | -.114   | .271       | -.089   | -.420  | .678 | -.041        |
| LDLPFC     | 37.411  | 99.463     | .097    | .376   | .710 | -.070        |
| LIPL       | 56.094  | 33.828     | .326    | 1.658  | .110 | .272         |
| RDLPFC     | -94.260 | 74.640     | -.348   | -1.263 | .219 | -.160        |
| RIPL       | -15.795 | 69.257     | -.044   | -.228  | .822 | -.027        |

$R^2=0.142$   $F=0.797$   $P= 0.563$

Table S8(f)  
LIPC (seed)

| Model      | B       | Std. Error | $\beta$ | t     | P    | Zero-order R |
|------------|---------|------------|---------|-------|------|--------------|
| (Constant) | 99.523  | 13.424     |         | 7.414 | .000 |              |
| Age        | -.074   | .291       | -.058   | -.255 | .801 | .026         |
| LDLPFC     | -32.926 | 74.047     | -.130   | -.445 | .660 | -.160        |
| RDLPFC     | -27.480 | 90.856     | -.085   | -.302 | .765 | -.129        |
| RIPL       | 5.212   | 72.781     | .019    | .072  | .943 | .044         |
| LIPL       | 54.094  | 32.828     | .316    | 1.458 | .107 | .252         |

$R^2=0.031$   $F=0.200$   $P= 0.936$

Table S8(g)  
LMTL (seed)

| Model      | B        | Std. Error | $\beta$ | t      | P    | Zero-order R |
|------------|----------|------------|---------|--------|------|--------------|
| (Constant) | 87.742   | 9.558      |         | 9.180  | .000 |              |
| Age        | .002     | .236       | .001    | .007   | .994 | -.015        |
| LDLPFC     | -33.699  | 81.186     | -.109   | -.415  | .682 | -.246        |
| RDLPFC     | -106.066 | 98.011     | -.253   | -1.082 | .290 | -.296        |
| RIPL       | 59.378   | 67.790     | .245    | .876   | .390 | .320         |
| LIPL       | 21.935   | 52.778     | .118    | .416   | .681 | .255         |

$R^2=0.210$   $F=1.277$   $P= 0.306$

Table S8(h)  
LHC (seed)

| Model      | B        | Std. Error | $\beta$ | t      | P    | Zero-order R |
|------------|----------|------------|---------|--------|------|--------------|
| (Constant) | 103.344  | 9.035      |         | 11.438 | .000 |              |
| Age        | -.309    | .275       | -.240   | -1.122 | .273 | -.015        |
| LDLPFC     | -114.504 | 96.864     | -.351   | -1.182 | .249 | -.240        |
| LIPL       | 115.998  | 74.371     | .433    | 1.560  | .132 | .165         |
| RDLPFC     | 2.803    | 88.958     | .009    | .032   | .975 | -.343        |
| RIPL       | -146.602 | 85.773     | -.453   | -1.709 | .100 | -.173        |

$R^2=0.235$   $F=1.472$   $P= 0.236$

Non-significant results of the regression analysis between habitual cTST (dependent variable) and DMN(seeded) inter-network connectivity with the CEN(table S8(a)-(h) above).

Table S9(a)  
LDLPFC (seed)

| Model      | B       | Std. Error | $\beta$ | t     | P    | Zero-order R |
|------------|---------|------------|---------|-------|------|--------------|
| (Constant) | 90.748  | 15.210     |         | 5.966 | .000 |              |
| LIPC       | 2.169   | 116.568    | .008    | .019  | .985 | .107         |
| RIPC       | -6.037  | 111.736    | -.019   | -.054 | .957 | .125         |
| Age        | .022    | .409       | .017    | .053  | .958 | -.007        |
| LMTL       | -75.936 | 128.804    | -.245   | -.590 | .562 | -.370        |
| LHC        | -19.108 | 135.394    | -.064   | -.141 | .889 | -.191        |
| MPFC       | -20.084 | 49.861     | -.110   | -.403 | .691 | -.248        |
| PCC        | -1.047  | 41.594     | -.007   | -.025 | .980 | .118         |
| RMTL       | -21.468 | 112.030    | -.072   | -.192 | .850 | -.278        |
| RHC        | -34.628 | 195.200    | -.077   | -.177 | .861 | -.228        |

$R^2=0.166$   $F=0.441$   $P= 0.987$

Table S9(b)  
LIPL (seed)

| Model      | B      | Std. Error | $\beta$ | t     | P    | Zero-order R |
|------------|--------|------------|---------|-------|------|--------------|
| (Constant) | 82.668 | 14.367     |         | 5.754 | .000 |              |
| Age        | -.021  | .316       | -.016   | -.065 | .949 | .026         |
| RIPC       | 38.251 | 64.987     | .139    | .589  | .562 | .044         |
| MPFC       | 58.918 | 38.995     | .323    | 1.511 | .145 | .266         |
| PCC        | 27.217 | 39.738     | .154    | .685  | .501 | .079         |
| RMTL       | 7.203  | 101.157    | .023    | .071  | .944 | .204         |
| LMTL       | 74.377 | 77.123     | .294    | .964  | .345 | .181         |
| RHC        | 59.180 | 68.429     | .179    | .865  | .396 | .203         |
| RIPC       | 5.212  | 72.781     | .019    | .072  | .943 | .044         |

$R^2=0.198$   $F=0.777$   $P= 0.613$

Table S9(c)  
RIPL (seed)

| Model      | B       | Std. Error | $\beta$ | t     | P    | Zero-order R |
|------------|---------|------------|---------|-------|------|--------------|
| (Constant) | 90.748  | 15.210     |         | 5.966 | .000 |              |
| LIPC       | 2.169   | 116.568    | .008    | .019  | .985 | .107         |
| RIPC       | -6.037  | 111.736    | -.019   | -.054 | .957 | .125         |
| Age        | .022    | .409       | .017    | .053  | .958 | -.007        |
| LMTL       | -75.936 | 128.804    | -.245   | -.590 | .562 | -.370        |
| LHC        | -19.108 | 135.394    | -.064   | -.141 | .889 | -.191        |
| MPFC       | -20.084 | 49.861     | -.110   | -.403 | .691 | -.248        |
| PCC        | -1.047  | 41.594     | -.007   | -.025 | .980 | .118         |
| RMTL       | -21.468 | 112.030    | -.072   | -.192 | .850 | -.278        |
| RHC        | -34.628 | 195.200    | -.077   | -.177 | .861 | -.228        |

$R^2=0.166$   $F=0.441$   $P= 0.897$

Table S9(d)  
RDLPFC (seed)

| Model      | B       | Std. Error | $\beta$ | t      | P    | Zero-order R |
|------------|---------|------------|---------|--------|------|--------------|
| (Constant) | 105.718 | 14.892     |         | 7.099  | .000 |              |
| Age        | -.187   | .543       | -.144   | -.344  | .734 | -.023        |
| LIPC       | .460    | 24.784     | .004    | .019   | .985 | -.060        |
| LMTL       | 91.470  | 46.464     | .687    | 1.969  | .063 | .437         |
| LHC        | 19.366  | 70.223     | .118    | .276   | .786 | .188         |
| MPFC       | -51.709 | 26.484     | -.417   | -1.952 | .065 | -.315        |
| PCC        | -14.400 | 40.582     | -.161   | -.355  | .726 | -.187        |
| RIPC       | 33.498  | 50.558     | .226    | .663   | .515 | -.058        |
| RMTL       | -29.235 | 48.624     | -.210   | -.601  | .554 | .217         |
| RHC        | -23.650 | 73.362     | -.137   | -.322  | .751 | .300         |

$R^2=0.387$   $F=1.405$   $P= 0.251$

Non-significant results of the regression analysis between habitual cTST (dependent variable) and CEN(seeded) inter-network connectivity with the DMN (table S9(a)-(d) above).



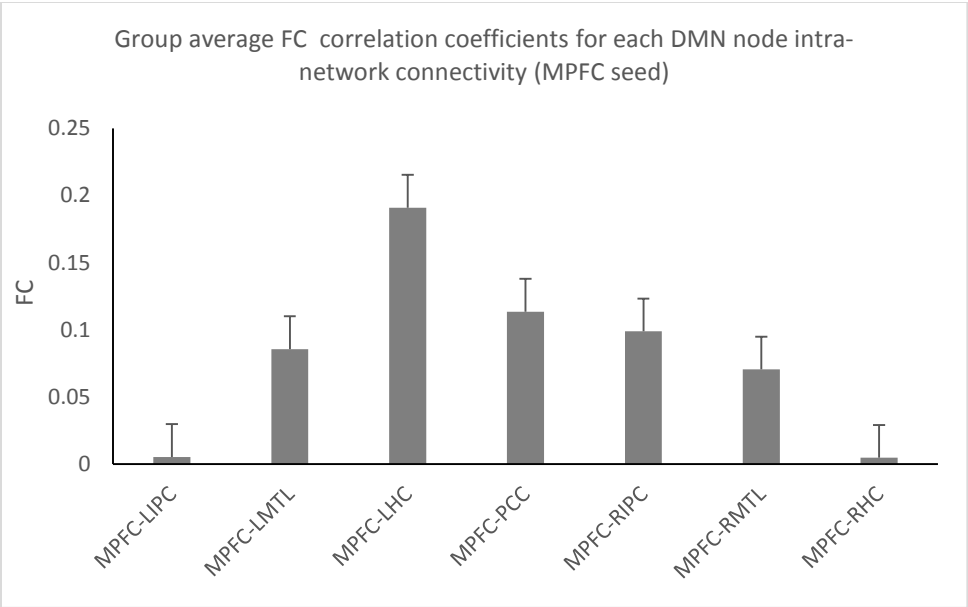

**Figure S1.**

Group correlation coefficient intra-network FC for each of the nodes of the DMN to the MPFC seed. Error bars represent standard deviation.

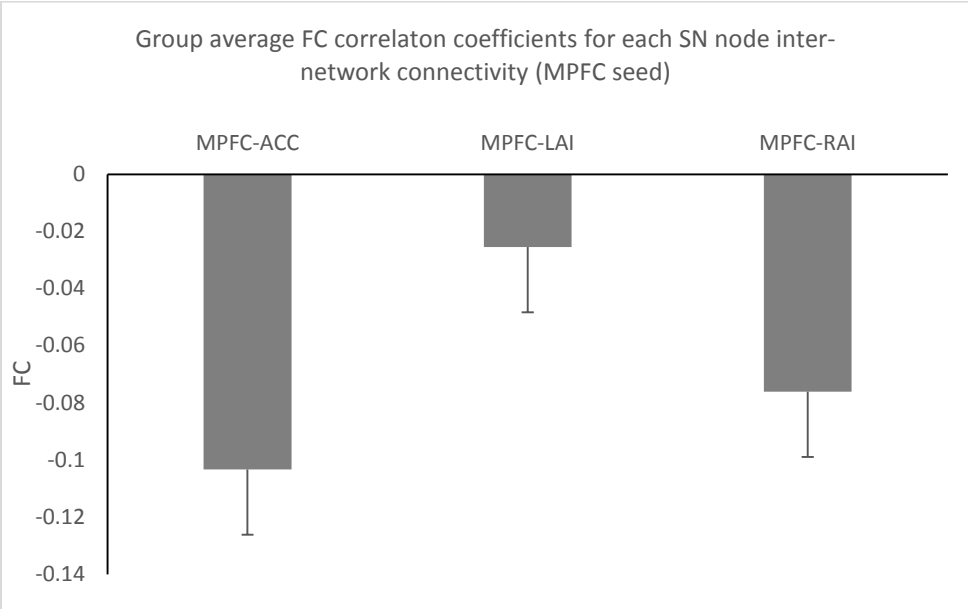

**Figure S2.**

Group correlation coefficient inter-network FC of the SN to the MPFC seed of the DMN. Error bars represent standard deviation.

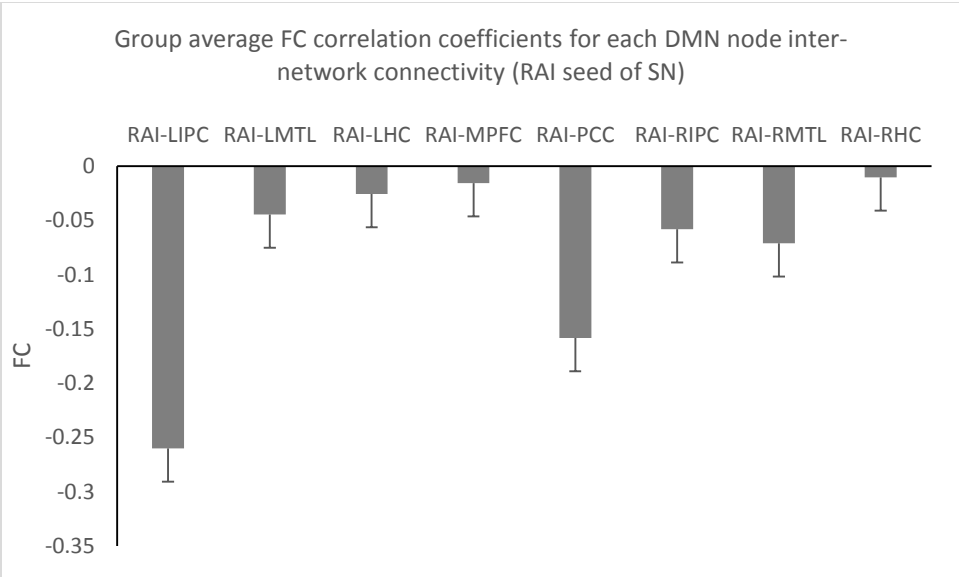

**Figure S3.**

Group correlation coefficient inter-network FC of the DMN to the RAI seed of the SN. Error bars represent standard deviation.
